# Supplementary material for: An artificial organosilicon receptor
Source: Royal Society of Chemistry journal article supplement (doi:10.1039/c2py20135f), 2012-01-01
Supplement: c2py20135f.pdf [file c2py20135f.pdf]

## Electronic Supplementary Information for:

### An Artificial Organosilicon Receptor

Vincenzo Abbate, Alan R. Bassindale, Kurt F. Brandstadt and Peter G. Taylor

#### S1. GC-FID quantification

Dodecane was used as an internal standard to gravimetrically quantitate the chromatographic analyses. The samples were prepared at ~1% (w/w) product in a THF solution containing 1% (w/w) dodecane. Based on triplicate measurements, the response factors for the analytes were calculated (Equation 1), and found to be linear as a function of concentration over four orders of magnitude (i.e. 0.01-10% (w/w), Figure S1 and Tables S1).

$$RF_{\text{analyte}} = ([\text{analyte}]/\text{Area}_{\text{analyte}}) \times (\text{Area}_{\text{IS}}/[\text{IS}]) \times RF_{\text{IS}} \quad (1)$$

The linearity of a set of response factors is illustrated in Figure S1.

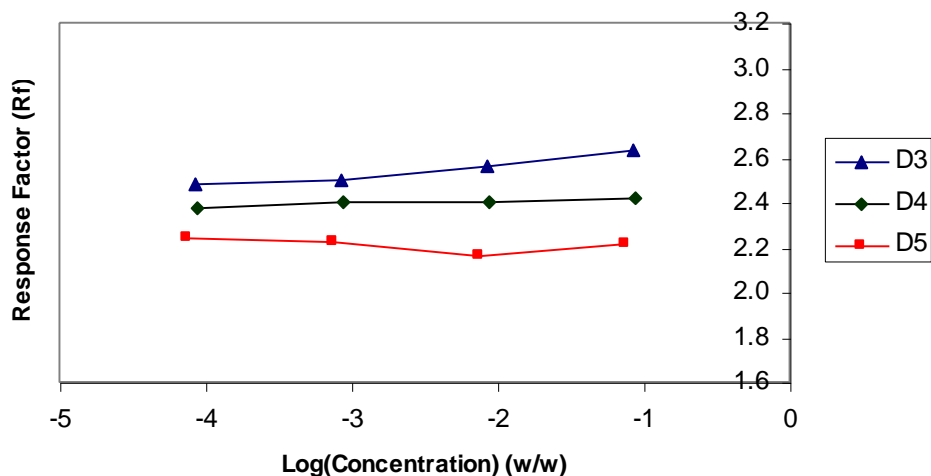

**Figure S1:** Evaluation of the experimental measurement of a response factor versus the concentration of an analyte over four orders of magnitude.

The terms in Equation 1 are defined as follows:  $RF_{\text{analyte}}$  = response factor for the analyte,  $[\text{analyte}]$  = concentration of the analyte,  $\text{Area}_{\text{analyte}}$  = peak area of the analyte,  $\text{Area}_{\text{IS}}$  = peak area of the internal standard,  $[\text{IS}]$  = concentration of the internal standard,  $RF_{\text{IS}}$  = response factor for the internal standard = 1. Subsequently, Equation 1 was solved to quantitatively calculate the concentration of an analyte in the presence of an internal standard (Equation 2).

$$[\text{analyte}] = (Rf_{\text{analyte}} \times \text{Area}_{\text{analyte}}) \times ([\text{IS}]/\text{Area}_{\text{IS}}) \quad (2)$$

**Table S1:** GC-FID cyclic siloxane retention times and response factors.

| Analyte        | Retention Time (m) | Average | Response Factor (RF) |      |
|----------------|--------------------|---------|----------------------|------|
|                |                    |         | Standard Deviation   | RSD  |
| D <sub>3</sub> | 5.011              | 2.692   | 0.04                 | 1.5% |
| D <sub>4</sub> | 7.916              | 2.516   | 0.014                | 0.6% |
| D <sub>5</sub> | 10.360             | 2.479   | 0.008                | 0.3% |

## S2. Synthesis of MIP- $\alpha_1$

$\alpha$ -D<sub>3</sub> complex (0.67g, 0.77mmol of  $\alpha$ -cyclodextrin based on the calculated stoichiometry) was dried *in vacuo* over silica gel prior to reaction, and dissolved in dried DMSO (6.7ml). The stirred solution was treated with excess 2,4-TDI (0.973ml, 6.77mmol) at room temperature, and the subsequent mixture heated to 70 °C while magnetically stirred. After approximately 2 hours, the gel formed was chopped into small pieces and poured into acetone. The resultant polymer was ground with a mortar and pestle and refluxed for one hour in water to remove any free  $\alpha$ -cyclodextrin and to allow the dissociation of the complex, one hour in THF, and then one hour in EtOH to further remove the template molecule as well as any unreacted TDI. Finally, the polymer was dried in a vacuum oven at 70 °C for 24 hours. During the drying process, the polymer was further ground to achieve a better particle size distribution. The urethane linkages in the polymer were confirmed from the CP MAS <sup>13</sup>C NMR spectroscopy, which also confirmed the complete removal of the cyclic template, due to the disappearance of the silicon peak. The

mole ratio of TDI to  $\alpha$ -cyclodextrin in the imprinted polymer was estimated from the elemental analysis.

CP MAS  $^{13}\text{C}$  NMR (100.56 MHz):  $\delta$  155.7 (carbonyl C of TDI), 136.7, 130.7 and 119.6 (aromatic C of TDI), 102.3 ( $\text{C}_1$  of  $\alpha$ -CD), 82.6 ( $\text{C}_4$  of  $\alpha$ -CD), 73.2 ( $\text{C}_2$ ,  $\text{C}_3$  and  $\text{C}_5$  of  $\alpha$ -CD), 63.7 ( $\text{C}_6$  of  $\alpha$ -CD) and 17.8 ( $\text{CH}_3$  of TDI) ppm. Found: C, 52.4; H, 5.75; N, 9.56 %. Calculated for TDI/  $\alpha$ -CD = 8.5: C, 54.74; H, 5.15; N, 9.65 %.

### S3. Synthesis of MIP- $\alpha_2$

A “non-imprinted” (blank) polymer was prepared in an identical manner to MIP- $\alpha_1$ , but in the absence of any preformed complex by treating free  $\alpha$ -CD with 2,4-TDI in DMSO.  $\alpha$ -CD (0.58g, 0.6mmol) was dried *in vacuo* at 70 °C for 24 hours prior to reaction, and dissolved in dried DMSO (5.8ml). The stirred solution was treated with excess 2,4-TDI (0.604mL, 4.2mmol) at room temperature and the subsequent mixture was heated to 70 °C while magnetically stirred. After approximately 2 hours, the gel formed was chopped into small pieces and poured into acetone. The resultant polymer was ground with a mortar and pestle and refluxed for one hour in water, one hour in THF, and then one hour in EtOH. Finally, the polymer was dried in a vacuum oven at 70 °C for 24 hours. During the drying process, the polymer was further ground to achieve a better particle size distribution. The urethane linkages in the polymer were confirmed from the CP MAS  $^{13}\text{C}$  NMR spectroscopy. The mole ratio of TDI to  $\beta$ -cyclodextrin in the imprinted polymer was evaluated by elemental analysis.

CP MAS  $^{13}\text{C}$  NMR (100.56 MHz):  $\delta$  155.6 (carbonyl C of TDI), 136.8, 130.8 and 117.5 (aromatic C of TDI), 102.2 ( $\text{C}_1$  of  $\alpha$ -CD), 83.3 ( $\text{C}_4$  of  $\alpha$ -CD), 72.8 ( $\text{C}_2$ ,  $\text{C}_3$  and  $\text{C}_5$  of  $\alpha$ -CD), 63.5 ( $\text{C}_6$  of  $\alpha$ -CD) and 18.1 ( $\text{CH}_3$  of TDI) ppm. Found: C, 53.31; H, 6.3; N, 8.62 %. Calculated for TDI/  $\alpha$ -CD = 6.5: C, 53.64; H, 5.24; N, 8.61 %.

### S4. Synthesis of MIP- $\beta_1$

$\beta$ -D<sub>3</sub> complex (1.9g, 1.5mmol of  $\beta$ -cyclodextrin based on the calculated stoichiometry) was dried *in vacuo* over silica gel prior to reaction and dissolved in dried DMSO (20ml). The stirred solution was treated with excess 2,4-TDI (1.6ml, 11.1mmol) at room temperature and the

subsequent mixture heated to 70 °C while magnetically stirred. After approximately 2 hours, the gel formed was chopped into small pieces and poured into acetone. The resultant polymer was ground with a mortar and pestle and refluxed for one hour in water to remove any free  $\beta$ -cyclodextrin and to allow the dissociation of the complex, one hour in THF, and then one hour in EtOH to further remove the template molecule as well as any unreacted TDI. Finally the polymer was dried in a vacuum oven at 70 °C for 24 hours. During the drying process, the polymer was further ground to achieve a better particle size distribution. The urethane linkages in the polymer were confirmed from the CP MAS  $^{13}\text{C}$  NMR spectroscopy, which also confirmed the complete removal of the cyclic template due to the disappearance of the silicon peak. The mole ratio of TDI to  $\beta$ -cyclodextrin in the imprinted polymer was evaluated by elemental analysis.

CP MAS  $^{13}\text{C}$  NMR (100.56 MHz):  $\delta$  155.8 (carbonyl C of TDI), 136.4, 130.5 and 118.1 (aromatic C of TDI), 102.5 ( $\text{C}_1$  of  $\beta$ -CD), 82.9 ( $\text{C}_4$  of  $\beta$ -CD), 72.9 ( $\text{C}_2$ ,  $\text{C}_3$  and  $\text{C}_5$  of  $\beta$ -CD), 64.3 ( $\text{C}_6$  of  $\beta$ -CD) and 17.1 ( $\text{CH}_3$  of TDI) ppm. Found: C, 53.08; H, 5.73; N, 8.85 %. Calculated for TDI/  $\beta$ -CD = 7.5: C, 53.66; H, 5.25; N, 8.55 %.

### S5. Synthesis of MIP- $\beta_2$

A “non-imprinted” (blank) polymer was prepared in an identical manner to MIP- $\beta_1$ , but in the absence of any preformed complex, by treating free  $\beta$ -CD with 2,4-TDI in DMSO.  $\beta$ -CD (0.94g, 0.83mmol) was dried in vacuo at 70 °C for 24 hours prior to reaction and dissolved in dried DMSO (9.4ml). The stirred solution was treated with excess 2,4-TDI (0.884ml, 6.15mmol) at room temperature and the subsequent mixture was heated to 70 °C while magnetically stirred. After approximately 2 hours, the gel formed was chopped into small pieces and poured into acetone. The resultant polymer was ground with a mortar and pestle and refluxed for one hour in water, one hour in THF, and then one hour in EtOH. Finally the polymer was dried in a vacuum oven at 70 °C for 24 hours. During the drying process, the polymer was further ground to achieve a better particle size distribution. The urethane linkages in the polymer were confirmed from the CP MAS  $^{13}\text{C}$  NMR spectroscopy. The mole ratio of TDI to  $\beta$ -cyclodextrin in the imprinted polymer was evaluated by elemental analysis.

CP MAS  $^{13}\text{C}$  NMR (100.56 MHz):  $\delta$  155.5 (carbonyl C of TDI), 136.4, 130.9 and 118.8 (aromatic C of TDI), 102.7 ( $\text{C}_1$  of  $\beta$ -CD), 82.6 ( $\text{C}_4$  of  $\beta$ -CD), 73.0 ( $\text{C}_2$ ,  $\text{C}_3$  and  $\text{C}_5$  of  $\beta$ -CD), 64.6

(C<sub>6</sub> of  $\beta$ -CD) and 17.9 (CH<sub>3</sub> of TDI) ppm. Found: C, 53.31; H, 5.92; N, 7.96 %. Calculated for TDI/  $\beta$ -CD = 7: C, 53.30; H, 5.28; N, 8.29 %.

### S6. Synthesis of MIP- $\gamma_1$

$\gamma$ -D<sub>5</sub> complex (1.05g, 0.75mmol of  $\gamma$ -cyclodextrin based on the calculated stoichiometry) was dried *in vacuo* over silica gel prior to reaction and dissolved in dried DMSO (10.5ml). The stirred solution was treated with 2,4-TDI (0.8ml, 5.5mmol) at room temperature and the subsequent mixture was heated to 70 °C while magnetically stirred. After approximately 2 hours, the gel formed was chopped into small pieces and poured into acetone. The resultant polymer was ground with a mortar and pestle and refluxed for one hour in water to remove any free  $\gamma$ -cyclodextrin and allow the dissociation of the complex, one hour in THF, and then one hour in EtOH to further remove the template molecule as well as unreacted TDI. Finally, the polymer was dried in a vacuum oven at 70 °C for 24 hours. During the drying process, the polymer was further ground to achieve a better particle size distribution. The urethane linkages in the polymer were confirmed from the CP MAS <sup>13</sup>C NMR spectroscopy, which also confirmed the complete removal of the cyclic template due to the disappearance of the silicon peak. The mole ratio of TDI to  $\gamma$ -cyclodextrin in the imprinted polymer was evaluated by elemental analysis.

CP MAS <sup>13</sup>C NMR (100.56 MHz):  $\delta$  155.3 (carbonyl C of TDI), 138.0, 130.7 and 118.7 (aromatic C of TDI), 102.8 (C<sub>1</sub> of  $\gamma$ -CD), 83.4 (C<sub>4</sub> of  $\gamma$ -CD), 73.4 (C<sub>2</sub>, C<sub>3</sub> and C<sub>5</sub> of  $\gamma$ -CD), 68.0 (C<sub>4</sub> of  $\gamma$ -CD) and 18.3 (CH<sub>3</sub> of TDI) ppm. Found: C, 53.78; H, 6.33; N, 7.61 %. Calcd for TDI/ $\beta$ CD = 7: C, 52.73; H, 5.34; N, 7.76 %.

### S7. Synthesis of MIP- $\gamma_2$

$\gamma$ -D<sub>4</sub> complex (1.3g, 0.93mmol of  $\gamma$ -cyclodextrin based on the calculated stoichiometry) was dried *in vacuo* over silica gel prior to reaction, and dissolved in dried DMSO (13ml). The stirred solution was treated with excess 2,4-TDI (1ml, 7mmol) at room temperature and the subsequent mixture heated to 70 °C while magnetically stirred. After approximately 2 hours, the gel formed was chopped into small pieces and poured into acetone. The resultant polymer was ground with a mortar and pestle and refluxed for one hour in water to remove any free  $\gamma$ -cyclodextrin and allow

the dissociation of the complex, one hour in THF, and then one hour in EtOH to further remove the template molecule as well as any unreacted TDI. Finally, the polymer was dried in a vacuum oven at 70 °C for 24 hours. During the drying process, the polymer was further ground to achieve a better particle size distribution. The urethane linkages in the polymer were confirmed from the CP MAS  $^{13}\text{C}$  NMR spectroscopy, which also confirmed the complete removal of the cyclic template due to the disappearance of the silicon peak. The mole ratio of TDI to  $\gamma$ -cyclodextrin in the imprinted polymer was evaluated by elemental analysis.

CP MAS  $^{13}\text{C}$  NMR (100.56 MHz):  $\delta$  155.7 (carbonyl C of TDI), 137.6, 135.1 and 125.3 (aromatic C of TDI), 103.0 ( $\text{C}_1$  of  $\gamma$ -CD), 83.4 ( $\text{C}_4$  of  $\gamma$ -CD), 72.9 ( $\text{C}_2$ ,  $\text{C}_3$  and  $\text{C}_5$  of  $\gamma$ -CD), 57.0 ( $\text{C}_4$  of  $\gamma$ -CD) and 17.6 ( $\text{CH}_3$  of TDI) ppm. Found: C, 52.76; H, 5.34; N, 8.72 %. Calculated for TDI/ $\beta$ -CD = 8: C, 53.29; H, 5.29; N, 8.29 %.

### S8. Synthesis of MIP- $\gamma_3$

$\gamma$ -D<sub>3</sub> complex (0.6g, approximately 0.4mmol of  $\gamma$ -cyclodextrin based on the calculated stoichiometry) was dried *in vacuo* over silica gel prior to reaction, and dissolved in dried DMSO (6ml). The stirred solution was treated with excess 2,4-TDI (0.403ml, 2.8mmol) at room temperature and the subsequent mixture was heated to 70 °C while magnetically stirred. After approximately 2 hours, the gel formed was chopped into small pieces and poured into acetone. The resultant polymer was ground with a mortar and pestle and refluxed for one hour in water to remove any free  $\gamma$ -cyclodextrin and allow the dissociation of the complex, one hour in THF, and then one hour in EtOH to further remove the template molecule as well as any unreacted TDI. Finally, the polymer was dried in vacuum oven at 70 °C for 24 hours. During the drying process, the polymer was further ground to achieve a better particle size distribution. The urethane linkages in the polymer were confirmed from the CP MAS  $^{13}\text{C}$  NMR spectroscopy, which also confirmed the complete removal of the cyclic template due to the disappearance of the silicon peak. The mole ratio of TDI to  $\gamma$ -cyclodextrin in the imprinted polymer was evaluated by elemental analysis.

CP MAS  $^{13}\text{C}$  NMR (100.56 MHz):  $\delta$  154.7 (carbonyl C of TDI), 135.6, 130.2 and 117.3 (aromatic C of TDI), 102.0 ( $\text{C}_1$  of  $\gamma$ -CD), 81.6 ( $\text{C}_4$  of  $\gamma$ -CD), 72.4 ( $\text{C}_2$ ,  $\text{C}_3$  and  $\text{C}_5$  of  $\gamma$ -CD), 61.5

(C<sub>6</sub> of  $\gamma$ -CD) and 16.5 (CH<sub>3</sub> of TDI) ppm. Found: C, 51.2; H, 5.73; N, 7.96 %. Calculated for TDI/  $\beta$ -CD = 7: C, 52.73; H, 5.34; N, 7.76 %.

### S9. Synthesis of MIP- $\gamma_4$

A “non-imprinted” (blank) polymer was prepared in an identical manner to MIPs- $\gamma_{1-3}$  but in the absence of any preformed complex by treating free  $\gamma$ -CD with 2,4-TDI in DMSO.  $\gamma$ -CD (1g, 0.77mmol) was dried *in vacuo* at 70 °C for 24 hours prior to reaction, and dissolved in dried DMSO (10 ml). The stirred solution was treated with 2,4-TDI (0.77ml, 5.4mmol) at room temperature and the subsequent mixture heated to 70 °C while magnetically stirred. After approximately 2 hours, the gel formed was chopped into pieces and poured into acetone. The resultant polymer was ground with a mortar and pestle and refluxed for one hour in water, one hour in THF, and then one hour in EtOH. Finally, the polymer was dried in a vacuum oven at 70 °C for 24 hours. During the drying process, the polymer was further ground to achieve a better particle size distribution. The urethane linkages in the polymer were confirmed from the CP MAS <sup>13</sup>C NMR spectroscopy. The mole ratio of TDI to  $\beta$ -cyclodextrin in the imprinted polymer was evaluated by elemental analysis.

CP MAS <sup>13</sup>C NMR (100.56 MHz):  $\delta$  154.5 (carbonyl C of TDI), 135.9, 130.0 and 117.4 (aromatic C of TDI), 102.2 (C<sub>1</sub> of  $\gamma$ -CD), 82.0 (C<sub>4</sub> of  $\gamma$ -CD), 72.6 (C<sub>2</sub>, C<sub>3</sub> and C<sub>5</sub> of  $\gamma$ -CD), 62.0 (C<sub>6</sub> of  $\gamma$ -CD) and 17.1 (CH<sub>3</sub> of TDI) ppm. Found: C, 51.29; H, 5.8; N, 7.87 %. Calculated for TDI/  $\beta$ -CD = 7: C, 52.73; H, 5.34; N, 7.76 %.

## S10 . Binding Studies

**Table S2:** Batch rebinding of the template and structural analogues to molecular imprinted cyclodextrins (MICDs).

| Reaction                                                 | initial $\mu\text{mol}$ | $\mu\text{mol}$ adsorbed | % recovery <sup>1</sup> |
|----------------------------------------------------------|-------------------------|--------------------------|-------------------------|
| MIP- $\alpha$ , 1mM D <sub>3</sub> in acetonitrile       | 0.5                     | 0.0                      | 100.0                   |
| MIP- $\alpha$ , 1mM D <sub>3</sub> in 95% acetonitrile   | 0.5                     | 0.06                     | 89.0                    |
| NIP- $\alpha$ , 1mM D <sub>3</sub> in acetonitrile       | 0.5                     | 0.0                      | 100.0                   |
| NIP- $\alpha$ , 1mM D <sub>3</sub> in 95% acetonitrile   | 0.5                     | 0.03                     | 95.0                    |
| MIP- $\beta$ , 1mM D <sub>3</sub> in acetonitrile        | 0.5                     | 0.03                     | 95.0                    |
| MIP- $\beta$ , 1mM D <sub>3</sub> in 95% acetonitrile    | 0.5                     | 0.24                     | 51.8                    |
| MIP- $\beta$ , 1mM D <sub>4</sub> in acetonitrile        | 0.5                     | 0.005                    | 99.1                    |
| MIP- $\beta$ , 1mM D <sub>4</sub> in 95% acetonitrile    | 0.5                     | 0.01                     | 97.2                    |
| MIP- $\beta$ , 1mM D <sub>5</sub> in acetonitrile        | 0.5                     | 0.008                    | 98.5                    |
| MIP- $\beta$ , 1mM D <sub>5</sub> in 95% acetonitrile    | 0.5                     | 0.001                    | 97.7                    |
| NIP- $\beta$ , 1mM D <sub>3</sub> in acetonitrile        | 0.5                     | 0.001                    | 99.8                    |
| NIP- $\beta$ , 1mM D <sub>3</sub> in 95% acetonitrile    | 0.5                     | 0.1                      | 79.6                    |
| MIP- $\gamma_1$ , 1mM D <sub>5</sub> in acetonitrile     | 0.5                     | 0.0                      | 100.0                   |
| MIP- $\gamma_1$ , 1mM D <sub>5</sub> in 95% acetonitrile | 0.5                     | 0.0                      | 100.0                   |
| MIP- $\gamma_1$ , 1mM D <sub>5</sub> in 90% acetonitrile | 0.5                     | 0.002                    | 99.7                    |
| MIP- $\gamma_1$ , 1mM D <sub>4</sub> in acetonitrile     | 0.5                     | 0.002                    | 99.6                    |
| MIP- $\gamma_1$ , 1mM D <sub>4</sub> in 95% acetonitrile | 0.5                     | 0.002                    | 97.7                    |
| MIP- $\gamma_1$ , 1mM D <sub>3</sub> in acetonitrile     | 0.5                     | 0.0                      | 100.0                   |
| MIP- $\gamma_1$ , 1mM D <sub>3</sub> in 95% acetonitrile | 0.5                     | 0.0005                   | 99.9                    |



|                                                                       |     |       |       |
|-----------------------------------------------------------------------|-----|-------|-------|
| MIP- $\gamma_2$ , 1mM D <sub>4</sub> in acetonitrile                  | 0.5 | 0.0   | 100.0 |
| MIP- $\gamma_2$ , 1mM D <sub>4</sub> in 95% acetonitrile              | 0.5 | 0.0   | 100.0 |
| MIP- $\gamma_2$ , 1mM D <sub>3</sub> in acetonitrile                  | 0.5 | 0.005 | 99.0  |
| MIP- $\gamma_2$ , 1mM D <sub>3</sub> <sup>3</sup> in 95% acetonitrile | 0.5 | 0.02  | 96.0  |
| MIP- $\gamma_2$ , 1mM D <sub>5</sub> in acetonitrile                  | 0.5 | 0.009 | 98.2  |
| MIP- $\gamma_3$ , 1mM D <sub>3</sub> in acetonitrile                  | 0.5 | 0.002 | 99.7  |
| MIP- $\gamma_3$ , 1mM D <sub>3</sub> in 95% acetonitrile              | 0.5 | 0.06  | 89.7  |
| MIP- $\gamma_3$ , 1mM D <sub>4</sub> in acetonitrile                  | 0.5 | 0.0   | 100   |
| MIP- $\gamma_3$ , 1mM D <sub>4</sub> in 95% acetonitrile              | 0.5 | 0.07  | 85.7  |
| MIP- $\gamma_3$ , 1mM D <sub>5</sub> in acetonitrile                  | 0.5 | 0.001 | 97.2  |
| MIP- $\gamma_3$ , 1mM D <sub>5</sub> in 95% acetonitrile              | 0.5 | 0.02  | 97.0  |
| NIP- $\gamma$ , 1mM D <sub>3</sub> in acetonitrile                    | 0.5 | 0.01  | 97.6  |
| NIP- $\gamma$ , 1mM D <sub>3</sub> in 95% acetonitrile                | 0.5 | 0.04  | 92.3  |
| NIP- $\gamma$ , 1mM D <sub>4</sub> in acetonitrile                    | 0.5 | 0.05  | 90.2  |
| NIP- $\gamma$ , 1mM D <sub>4</sub> in 95% acetonitrile                | 0.5 | 0.06  | 87.3  |
| NIP- $\gamma$ , 1mM D <sub>5</sub> in acetonitrile                    | 0.5 | 0.0   | 100.0 |
| NIP- $\gamma$ , 1mM D <sub>5</sub> in 95% acetonitrile                | 0.5 | 0.04  | 92.5  |

---

<sup>1</sup> % of free (unbound) analyte (average value).

## S11. Polymer Characterization

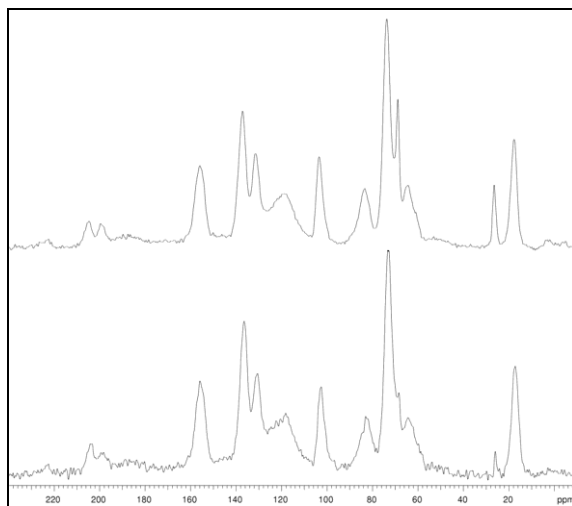

**Figure S1:**  $^{13}\text{C}$  CP MAS NMR of MIP- $\beta$  after its preparation (bottom), and after the extensive wash to restore its activity (top).
